# Supplementary material
Source: PubMed Central journal article supplement (PMC7344797)
Supplement: jamapsychiatry-e201935-s001.pdf [file jamapsychiatry-e201935-s001.pdf]

## Supplementary Online Content

Paksarian D, Rudolph K, Stapp EK, et al. Association of outdoor artificial light at night with mental disorders and sleep patterns among US adolescents. *JAMA Psychiatry*. Published online July 8, 2020. doi:10.1001/jamapsychiatry.2020.1935

**eTable 1.** Associations between quartiles of outdoor artificial light at night and sleep patterns among adolescents

**eTable 2.** Results of interaction tests between outdoor artificial light at night and sex, age among boys, and years since menarche among girls

**eFigure.** Predicted mean weeknight bedtimes for adolescent girls by quartile of outdoor artificial light at night, for those who are 1, 3, and 5 years post menarche

**eTable 3.** Associations between quartiles of outdoor artificial light at night and sleep patterns among adolescents; sensitivity analysis in which extreme reports (outside 3 standard deviations) are not excluded

**eTable 4.** Associations between quartiles of outdoor artificial light at night and sleep patterns among adolescents; sensitivity analysis in which bedtimes reported as 12:00 Noon are recoded as Midnight

**eTable 5.** Sensitivity analysis including categorical season variable in Model 3 of eTable 1

**eTable 6.** Sensitivity analysis including categorical season variable in Model 3 of Table 2

This supplementary material has been provided by the authors to give readers additional information about their work.

eTable 1. Associations between quartiles of outdoor artificial light at night and sleep patterns among adolescents

| Quartile of ALAN                                       | Model 1  |                  |         | Model 2  |                 |         | Model 3  |                 |         |
|--------------------------------------------------------|----------|------------------|---------|----------|-----------------|---------|----------|-----------------|---------|
|                                                        | Estimate | 95% CI           | P-value | Estimate | 95% CI          | P-value | Estimate | 95% CI          | P-value |
| <i>Weeknight bedtime in minutes (n=9,871):</i>         |          |                  |         |          |                 |         |          |                 |         |
| <b>Lowest</b>                                          | (Ref.)   | ---              | <.001   | (Ref.)   | ---             | 0.001   | (Ref.)   | ---             | .002    |
| <b>2<sup>nd</sup></b>                                  | 14.47    | (8.07, 20.87)    |         | 13.44    | (6.08, 20.80)   |         | 12.65    | (5.28, 20.01)   |         |
| <b>3<sup>rd</sup></b>                                  | 23.16    | (15.33, 31.00)   |         | 23.01    | (12.26, 33.76)  |         | 22.08    | (10.92, 33.24)  |         |
| <b>Highest</b>                                         | 28.56    | (18.82, 38.30)   |         | 29.56    | (14.65, 44.46)  |         | 29.35    | (15.22, 43.47)  |         |
| <i>Weekend bedtime delay in minutes (n=9,404):</i>     |          |                  |         |          |                 |         |          |                 |         |
| <b>Lowest</b>                                          | (Ref.)   | ---              | .240    | (Ref.)   | ---             | 0.195   | (Ref.)   | ---             | .326    |
| <b>2<sup>nd</sup></b>                                  | -0.24    | (-9.46, 8.98)    |         | -1.01    | (-13.63, 11.61) |         | -0.11    | (-12.64, 12.42) |         |
| <b>3<sup>rd</sup></b>                                  | -5.87    | (-14.64, 2.90)   |         | -6.46    | (-18.32, 5.40)  |         | -5.05    | (-16.92, 6.83)  |         |
| <b>Highest</b>                                         | -3.43    | (-11.75, 4.90)   |         | -3.41    | (-15.69, 8.87)  |         | -2.26    | (-14.51, 9.99)  |         |
| <i>Weeknight sleep duration in minutes (n=10,018):</i> |          |                  |         |          |                 |         |          |                 |         |
| <b>Lowest</b>                                          | (Ref.)   | ---              | <.001   | (Ref.)   | ---             | <.001   | (Ref.)   | ---             | <.001   |
| <b>2<sup>nd</sup></b>                                  | -17.24   | (-23.04, -11.44) |         | -13.65   | (-19.78, -7.51) |         | -13.89   | (-19.74, -8.04) |         |
| <b>3<sup>rd</sup></b>                                  | -12.71   | (-19.29, -6.13)  |         | -9.05    | (-15.58, -2.52) |         | -10.32   | (-16.56, -4.07) |         |
| <b>Highest</b>                                         | -8.77    | (-15.29, -2.24)  |         | -5.34    | (-13.60, 2.93)  |         | -10.58   | (-19.18, -1.97) |         |
| <i>Weekend oversleep in minutes (n=9,890):</i>         |          |                  |         |          |                 |         |          |                 |         |
| <b>Lowest</b>                                          | (Ref.)   | ---              | .001    | (Ref.)   | ---             | 0.175   | (Ref.)   | ---             | .155    |
| <b>2<sup>nd</sup></b>                                  | 22.87    | (10.73, 35.00)   |         | 12.41    | (-2.02, 26.85)  |         | 11.15    | (-3.02, 25.32)  |         |
| <b>3<sup>rd</sup></b>                                  | 23.31    | (12.24, 34.38)   |         | 12.87    | (-3.33, 29.06)  |         | 10.32    | (-6.29, 26.94)  |         |
| <b>Highest</b>                                         | 14.50    | (1.66, 27.35)    |         | 4.90     | (-12.11, 21.91) |         | 1.57     | (-17.42, 20.55) |         |

Note: Positive values indicate later bedtimes and greater amounts of bedtime delay, sleep duration, and oversleep. Model 1 is adjusted for age and sex. Model 2 is additionally adjusted for race/ethnicity, family income, parental education, family structure, nativity, region, and urbanicity. Model 3 is additionally adjusted for area-level population density and socioeconomic status. 48 adolescents missing values for area-level SES were not included in Model 3. P-values are from Wald F tests.

eTable 2. Results of interaction tests between outdoor artificial light at night and sex, age among boys, and years since menarche among girls.

| Interaction                       | Outcome                  | F Statistic | df | P-value |
|-----------------------------------|--------------------------|-------------|----|---------|
| Sex                               | Weeknight Bedtime        | 0.61        | 3  | .6144   |
|                                   | Weeknight Sleep Duration | 0.40        | 3  | .7515   |
|                                   | Weekend Bedtime Delay    | 0.73        | 3  | .5373   |
|                                   | Weekend Oversleep        | 0.46        | 3  | .7149   |
|                                   | Mood Disorder            | 3.26        | 1  | .0781   |
|                                   | Anxiety Disorder         | 0.79        | 1  | .3797   |
|                                   | Substance Use Disorder   | 0.01        | 1  | .9219   |
|                                   | Behavior Disorder        | 0.00        | 1  | .9774   |
| Age (boys Only)                   | Weeknight Bedtime        | 1.27        | 3  | .2975   |
|                                   | Weeknight Sleep Duration | 0.36        | 3  | .7853   |
|                                   | Weekend Bedtime Delay    | 0.98        | 3  | .4091   |
|                                   | Weekend Oversleep        | 0.59        | 3  | .6236   |
|                                   | Mood Disorder            | 0.06        | 1  | .8044   |
|                                   | Anxiety Disorder         | 0.05        | 1  | .8298   |
|                                   | Substance Use Disorder   | 2.62        | 1  | .1132   |
|                                   | Behavior Disorder        | 2.30        | 1  | .1365   |
| Years since Menarche (girls only) | Weeknight Bedtime        | 8.15        | 3  | .0002   |
|                                   | Weeknight Sleep Duration | 0.77        | 3  | .5189   |
|                                   | Weekend Bedtime Delay    | 1.66        | 3  | .1903   |
|                                   | Weekend Oversleep        | 1.13        | 3  | .3463   |
|                                   | Mood Disorder            | 0.17        | 1  | .6859   |
|                                   | Anxiety Disorder         | 1.29        | 1  | .2622   |
|                                   | Substance Use Disorder   | 2.43        | 1  | .1269   |
|                                   | Behavior Disorder        | 0.05        | 1  | .8165   |

Note: P-values do not correct for multiple comparisons.

eFigure. Predicted mean weeknight bedtimes for adolescent girls by quartile of outdoor artificial light at night, for those who are 1, 3, and 5 years post menarche.

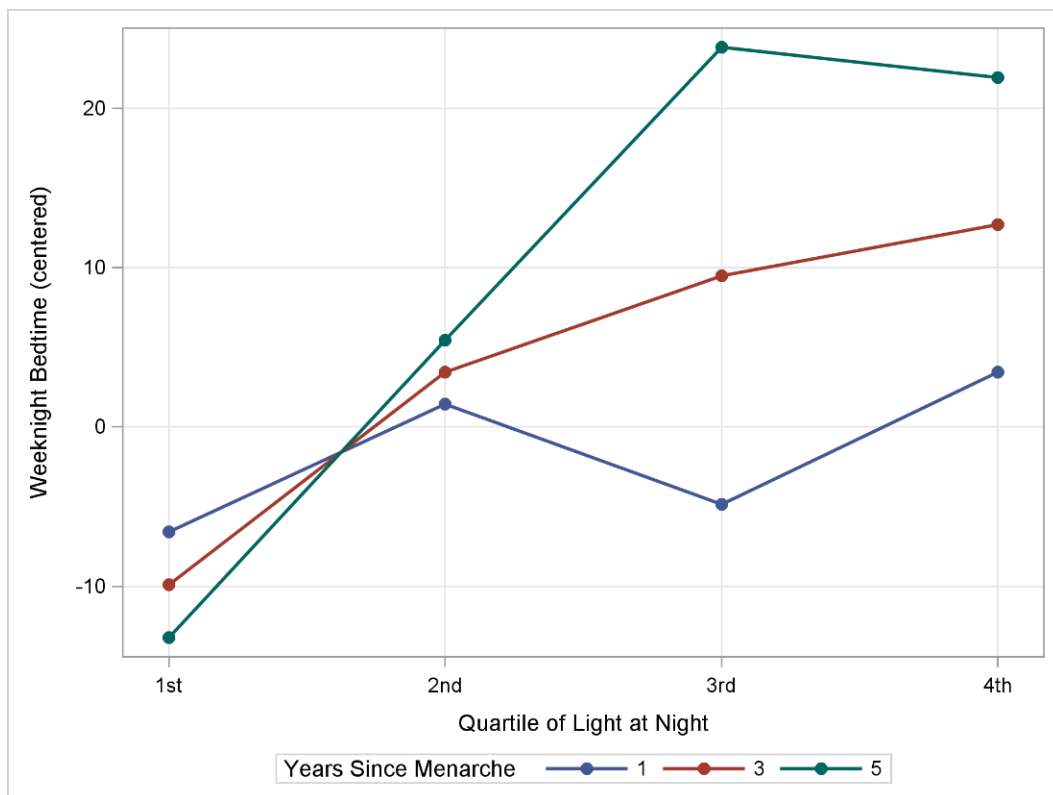

Note: predictions generated for the mean sample age (15.2 years) and not adjusted for other covariates.

eTable 3. Associations between quartiles of outdoor artificial light at night and sleep patterns among adolescents; sensitivity analysis in which extreme reports (outside 3 standard deviations) are not excluded

| Quartile of ALAN                                     | Model 1  |                  |         | Model 2  |                 |         | Model 3  |                 |         |
|------------------------------------------------------|----------|------------------|---------|----------|-----------------|---------|----------|-----------------|---------|
|                                                      | Estimate | 95% CI           | P-value | Estimate | 95% CI          | P-value | Estimate | 95% CI          | P-value |
| <i>Weeknight bedtime in minutes (n=10,094):</i>      |          |                  |         |          |                 |         |          |                 |         |
| <b>Lowest</b>                                        | (Ref.)   | ---              | <.001   | (Ref.)   | ---             | .001    | (Ref.)   | ---             | .005    |
| <b>2<sup>nd</sup></b>                                | 19.63    | (9.55, 29.71)    |         | 20.95    | (9.08, 32.83)   |         | 20.11    | (8.21, 32.01)   |         |
| <b>3<sup>rd</sup></b>                                | 28.88    | (15.66, 42.11)   |         | 30.90    | (15.11, 46.69)  |         | 29.22    | (13.23, 45.21)  |         |
| <b>Highest</b>                                       | 31.15    | (18.19, 44.12)   |         | 34.95    | (18.46, 51.44)  |         | 30.81    | (13.74, 47.89)  |         |
| <i>Weeknight bedtime delay in minutes (n=9,989):</i> |          |                  |         |          |                 |         |          |                 |         |
| <b>Lowest</b>                                        | (Ref.)   | ---              | .469    | (Ref.)   | ---             | .199    | (Ref.)   | ---             | .845    |
| <b>2<sup>nd</sup></b>                                | -8.53    | (-24.26, 7.20)   |         | -11.38   | (-28.57, 5.80)  |         | -7.42    | (-24.50, 9.67)  |         |
| <b>3<sup>rd</sup></b>                                | -8.08    | (-21.45, 5.29)   |         | -11.90   | (-28.26, 4.45)  |         | -3.69    | (-21.72, 14.35) |         |
| <b>Highest</b>                                       | -11.25   | (-28.53, 6.03)   |         | -17.87   | (-35.26, -0.49) |         | -1.90    | (-20.49, 16.70) |         |
| <i>Weekend sleep duration in minutes (n=10,080):</i> |          |                  |         |          |                 |         |          |                 |         |
| <b>Lowest</b>                                        | (Ref.)   | ---              | <.001   | (Ref.)   | ---             | <.001   | (Ref.)   | ---             | <.001   |
| <b>2<sup>nd</sup></b>                                | -18.34   | (-23.55, -13.14) |         | -14.80   | (-20.10, -9.49) |         | -14.94   | (-19.99, -9.89) |         |
| <b>3<sup>rd</sup></b>                                | -14.40   | (-21.16, -7.63)  |         | -11.06   | (-18.10, -4.02) |         | -12.23   | (-19.11, -5.35) |         |
| <b>Highest</b>                                       | -8.68    | (-15.65, -1.71)  |         | -5.86    | (-15.07, 3.35)  |         | -11.30   | (-20.73, -1.87) |         |
| <i>Weekend oversleep in minutes (n=10,004):</i>      |          |                  |         |          |                 |         |          |                 |         |
| <b>Lowest</b>                                        | (Ref.)   | ---              | <.001   | (Ref.)   | ---             | .135    | (Ref.)   | ---             | .124    |
| <b>2<sup>nd</sup></b>                                | 23.35    | (10.93, 35.77)   |         | 12.73    | (-1.94, 27.41)  |         | 11.31    | (-3.17, 25.80)  |         |
| <b>3<sup>rd</sup></b>                                | 23.58    | (12.40, 34.77)   |         | 13.41    | (-2.97, 29.78)  |         | 10.71    | (-6.05, 27.47)  |         |
| <b>Highest</b>                                       | 13.84    | (1.20, 26.48)    |         | 4.63     | (-11.95, 21.20) |         | 1.65     | (-16.29, 19.58) |         |

Note: Positive values indicate later bedtimes and greater amounts of bedtime delay, sleep duration, and oversleep. Model 1 is adjusted for age and sex. Model 2 is additionally adjusted for race/ethnicity, family income, parental education, family structure, nativity, region, and urbanicity. Model 3 is additionally adjusted for area-level population density and socioeconomic status. 48 adolescents missing values for area-level SES were not included in Model 3. P-values are from Wald F tests.

eTable 4. Associations between quartiles of outdoor artificial light at night and sleep patterns among adolescents; sensitivity analysis in which bedtimes reported as 12:00 Noon are recoded as Midnight

| Quartile of ALAN                                     | Model 1  |                |         | Model 2  |                |         | Model 3  |                |         |
|------------------------------------------------------|----------|----------------|---------|----------|----------------|---------|----------|----------------|---------|
|                                                      | Estimate | 95% CI         | P-value | Estimate | 95% CI         | P-value | Estimate | 95% CI         | P-value |
| <i>Weeknight bedtime in minutes (n=9,948):</i>       |          |                |         |          |                |         |          |                |         |
| <b>Lowest</b>                                        | (Ref.)   | ---            | <.001   | (Ref.)   | ---            | <.001   | (Ref.)   | ---            | <.001   |
| <b>2<sup>nd</sup></b>                                | 13.71    | (7.73, 19.69)  |         | 12.28    | (5.79, 18.76)  |         | 11.49    | (5.11, 17.88)  |         |
| <b>3<sup>rd</sup></b>                                | 22.59    | (15.02, 30.16) |         | 22.16    | (12.06, 32.27) |         | 21.28    | (10.79, 31.76) |         |
| <b>Highest</b>                                       | 28.54    | (19.24, 37.84) |         | 29.50    | (15.52, 43.49) |         | 29.46    | (16.46, 42.46) |         |
| <i>Weeknight bedtime delay in minutes (n=9,687):</i> |          |                |         |          |                |         |          |                |         |
| <b>Lowest</b>                                        | (Ref.)   | ---            | .082    | (Ref.)   | ---            | .183    | (Ref.)   | ---            | .238    |
| <b>2<sup>nd</sup></b>                                | 0.06     | (-7.47, 7.59)  |         | 0.21     | (-9.15, 9.57)  |         | 1.10     | (-8.04, 10.24) |         |
| <b>3<sup>rd</sup></b>                                | -6.10    | (-14.43, 2.24) |         | -5.75    | (-16.34, 4.85) |         | -4.51    | (-14.97, 5.95) |         |
| <b>Highest</b>                                       | -4.17    | (-12.00, 3.67) |         | -3.69    | (-14.22, 6.85) |         | -3.36    | (-14.01, 7.28) |         |

Note: Positive values indicate later bedtimes and greater amounts of bedtime delay. Model 1 is adjusted for age and sex. Model 2 is additionally adjusted for race/ethnicity, family income, parental education, family structure, nativity, region, and urbanicity. Model 3 is additionally adjusted for area-level population density and socioeconomic status. 48 adolescents missing values for area-level SES were not included in Model 3. P-values are from Wald F tests.

eTable 5. Sensitivity analysis including categorical season variable in Model 3 of eTable 1

| Quartile of ALAN                                       | Model 3 of eTable 1 |                 |         | Adding season |                 |         |
|--------------------------------------------------------|---------------------|-----------------|---------|---------------|-----------------|---------|
|                                                        | Estimate            | 95% CI          | P-value | Estimate      | 95% CI          | P-value |
| <i>Weeknight bedtime in minutes (n=9,871):</i>         |                     |                 |         |               |                 |         |
| <b>Lowest</b>                                          | (Ref.)              | ---             | .002    | (Ref.)        | ---             | .002    |
| <b>2<sup>nd</sup></b>                                  | 12.65               | (5.28, 20.01)   |         | 13.64         | (6.02, 21.26)   |         |
| <b>3<sup>rd</sup></b>                                  | 22.08               | (10.92, 33.24)  |         | 22.92         | (11.63, 34.21)  |         |
| <b>Highest</b>                                         | 29.35               | (15.22, 43.47)  |         | 29.81         | (14.99, 44.63)  |         |
| <i>Weekend bedtime delay in minutes (n=9,404):</i>     |                     |                 |         |               |                 |         |
| <b>Lowest</b>                                          | (Ref.)              | ---             | .326    | (Ref.)        | ---             | .398    |
| <b>2<sup>nd</sup></b>                                  | -0.11               | (-12.64, 12.42) |         | -1.15         | (-13.97, 11.67) |         |
| <b>3<sup>rd</sup></b>                                  | -5.05               | (-16.92, 6.83)  |         | -5.63         | (-17.99, 6.73)  |         |
| <b>Highest</b>                                         | -2.26               | (-14.51, 9.99)  |         | -3.02         | (-15.56, 9.53)  |         |
| <i>Weeknight sleep duration in minutes (n=10,018):</i> |                     |                 |         |               |                 |         |
| <b>Lowest</b>                                          | (Ref.)              | ---             | <.001   | (Ref.)        | ---             | <.001   |
| <b>2<sup>nd</sup></b>                                  | -13.89              | (-19.74, -8.04) |         | -13.09        | (-18.99, -7.19) |         |
| <b>3<sup>rd</sup></b>                                  | -10.32              | (-16.56, -4.07) |         | -9.74         | (-16.09, -3.39) |         |
| <b>Highest</b>                                         | -10.58              | (-19.18, -1.97) |         | -10.13        | (-18.55, -1.70) |         |
| <i>Weekend oversleep in minutes (n=9,890):</i>         |                     |                 |         |               |                 |         |
| <b>Lowest</b>                                          | (Ref.)              | ---             | .155    | (Ref.)        | ---             | .208    |
| <b>2<sup>nd</sup></b>                                  | 11.15               | (-3.02, 25.32)  |         | 10.35         | (-3.68, 24.38)  |         |
| <b>3<sup>rd</sup></b>                                  | 10.32               | (-6.29, 26.94)  |         | 9.99          | (-6.78, 26.77)  |         |
| <b>Highest</b>                                         | 1.57                | (-17.42, 20.55) |         | 0.77          | (-18.23, 19.77) |         |

Note: Season was measured according to the month in which the interview started and entered as a 4-level categorical variable. A season\*region interaction is included because it was present for bedtime delay.

eTable 6. Sensitivity analysis including categorical season variable in Model 3 of Table 2

| Disorder Class   | Model 3 of Table 2 |              |         | Adding Season |              |         |
|------------------|--------------------|--------------|---------|---------------|--------------|---------|
|                  | OR                 | 95% CI       | P-value | OR            | 95% CI       | P-value |
| <b>Mood</b>      | 1.07               | (1.00, 1.14) | .038    | 1.07          | (1.00, 1.14) | .046    |
| <b>Anxiety</b>   | 1.10               | (1.05, 1.16) | <.001   | 1.10          | (1.05, 1.16) | <.001   |
| <b>Substance</b> | 1.00               | (0.90, 1.11) | .964    | 1.00          | (0.90, 1.11) | .980    |
| <b>Behavior</b>  | 1.04               | (0.93, 1.17) | .457    | 1.05          | (0.93, 1.17) | .452    |

Note: Season was measured according to the month in which the interview started and entered as a 4-level categorical variable. No season\*region interactions were present.
